# Supplementary material
Source: PubMed Central journal article supplement (PMC5559007)
Supplement: pnas.1702204114.sd01.pdf [file pnas.1702204114.sd01.pdf]

**Simian HEMO nucleotide sequences**

> Gibbon (Hylobates)

**ATG**GGCTCCCTTTCAAACATGCCCCTGCTTCAACTAACCCCTACTGCTTTTTTGACAATTCTAGTACAACCTCAACACCTGCTTGCTCCAGTTTTCCGGA  
CACTATCTATCTTGACGAATCAGTCTAATTTGCTGGTATGTGAACATCTAGATAATGCGGAACAACCGAAGTACTGTTTTGTTCTGCGAGTGAAGCAC  
CTGGTGGACCTATTCTGGACAATGGGTGTATGAAAGGGTGTGGTATCCACAAGCAGAAGTACAGAATCACTCTACTTCTCCTATGGTAAAGTGAAGTCTCG  
CACTGGGAAGCCTCCATGGAAGCTCAAGGCTATCCCTTTCGCTCAAGTAAAGTTATTGGAGGAAATCTTCTCTTTGATAGAAAATAAAAATGGAACCTG  
GACCCCTCCAGGTAATATACCTAAACGATACTGTAATCAAACTACTATGGTTTGTATCTACAGATGGCACCTTCATGCCCCTACAGATGTTACAAATGA  
ATCCAGGAATGATTATGATGATACAAAGTGTTCCTTAGGCCTAGGCCTAGACAATGTTCCCTGGCTTGCAGGTTGCACAAACCGAGCTCGGAACAGCTCAGCTGTT  
CCCTTGATTGGTCTGCCCAATACACAAGACTACAAATGGGTAGATCGAAATCTGGATTGACCTGGTCAAGTAATGACACCTGTCTCTATAGCTGCCAAA  
ACCAACCAAAGGCCCTCTGTACCAGCTATTTCGCAACCTATTTCCTTATGGCTGACAGAGGCACATGGGAAATGGAGATGTGAGATGTCACCAT  
AATAATGACAAAGGTTATGACGGACACAGACCCACCCCTGGTGGCTCACAGGTTCCAATCTGACCTTGTCTGTGAACAACCTGGCCCTTTTTTTTTTA  
TGCGGCAATGGGGTGTACAAAGGGTTTCCACCTAAATGGCTGGGGCATGTGGACTGGGTATCTTTGATACCTTCCCTCACCAGATACCTCACCTAAATG  
CTAGCCAAATTACAAACCTGAGATCCTTCATTCATAAAGTAACACCACATAGATGCACCCAGCGAGACACAGACAATCCACCTCTGTATTGCAACCCCAA  
GCACAAATCAACAATAGGGGCCCTTTTTCCAAAGTTTGGGAACCTATGATTTAGAAAAGGCAATCTAAACATTTCCAAAGCAATGGAACAGGAATTCAGT  
GCCACTAAGCAGACCTTGAAGCACACCAATCAAAGTTAGCAGTTTAGCCTCTGCATCCCAGAAAGGATCATGTCTTGGATATACCAACCCCAACGAC  
AAACAGCTTGTAGAACTGTTGGCAACAGTGTTCCTCTATATAAAATCAATTCGGAAGCAATAATGTCTAATATACAGCGCTCCGCGAAGCATCCGAGAA  
CCTGAAGAATGACCATTACTGGATTGGGAAGGCATATTGCAAAAGTGGGAGACTGGTTCAGATCATGGGGTACGTGCTTTAATTTGTTCTTTTCTGC  
TTATTCATCTTTGTTTAAATCTATGTTTCGTGCTTTTGGCAATCTCCAGATCCCTTAACTCCAACCTCTGAACCCAGCCTTATCTCCACAGCAATCAG  
CACAGCAGCTTGTCAAGTTCATGTCAGTTTCAAATAGGGCAATGAAGGACTAACAAACCCATCAATATGACACAAGTCTACTTT**TGA**

> Baboon (Papio anubis)OWM

**ATG**GTCTCCCTTTCAAACATGCCCCTGCTTCAATTAACCCCTACTGCTTTTTTGACAATTCTAGTACAAGCTCAACACCTGCTTGACACAGTTTTCCAAA  
CACTAFTCTATCTTGACTAATCAGTCTAATTTGCTGGCTATGTGAGCATCTAGATAATGCGAACAACCGAAGTACTGTTTTGTTCTGCGAGTGAAGCAC  
CTGGTGGACCTATTCTGGACAATGGATGTATGAAAGGGTGTGGTATCCACAAGCAGAAGTACAGAATCACTCTACTTCTCCTATGGTAAAGTGAAGTCTAG  
CACTGGGAAGCCTCCATGGAAGCTCAAGGCTATCCCTTCGCTCAAGTAAAGTTATTGGAGGAAATCTTCTCTTTGATAGAAAATAAAAATGGCAGTCTG  
GACCCCTCCAGGTAATATACCTAAACAATACTGTAATCAAACTACTATGGTTTGTATTTACAGATGGCACCTTCATGCCCCTCCTATAGATGTTACAGATGA  
ATCCAGGAATGATTATGATGATACAAAGTGTTCCTTAGGCCTAGGCCTAGACAATGTTCCCTGGTTCGAGGTTGCACAAACCGAGCTCGGAACAGTCTAGCTGTT  
CCCTTGATTGGTCTACCCAATACCCAAGACTACAAATGGGTAGATCGAAATCTGGATTGACCTGGTCAAGTAATGGCACCTGTCTTTATAGCTGCCAAA  
ACCAACCAAAGGCCCTCTGTACCAGCTATTTCGCAACCTATTTCCTTATGGCTGACAGAGGCACATGGGAAATGGAGATGTGAGATGTCACCAT  
AATAATGACAAAGGTCATGATGGACACCAGACCCACCCCTGGTGGCTCACAGGTTCCAATCTGACCTTGTCTGTGAACAACCTGGCCCTTTTTTTTTTA  
TGCGGCAATGGGGTGTACAAAGGGTTTCCACCTAAATGGCTGGAGCATGTGGACTGGGTATCTGGTACCTTCCCTCACCAGATACCTCACCTAAATG  
CTAGCCAAATTACAAACCTGAGATCCTTCATTCATAAAGTAACACCACATAGATGCACCCAACGAGACACAGACAATCCACCTCTGTATTGCAACCCCAA  
GGCAATTAACAATAGGGGCCCTTTTTCCAAAGTTTGGGAACCTATGATTTGGAAGGCAATCTAAACATTTCCAAAGCAATGGAACAGGAATTCAGT  
GCCACTAAGCAGACCTTGAAGCACACCAATCAAAGTTAGCAGTTTAGCCTCTGCATCCCAGAAAGGATCATGTCTTGGATATACCAACCCCAACGAC  
AAACGGCTTGTAGAACTGTTGGCAACAGTGTTCCTCTATATAAAATCAATTCGGAAGCAATAATGTCTGATAACAACATCTATATGAAATATCCGAGAA  
CCTGAAGAATGGACCTTTTTTTGATTGGGAAGGCCTATTGCAAAAGTGGGAGACTGGTTCAGATCATGGGGTATGTGCTTTAATTTGTTCTTTTCTGC  
TTATTCATCTTTGTTTAAATCTATGTTTCGTGCTTTTGGCAATCTCCAGATCCCTTAACTCCAACCTCTGAACCCAGCCTTGTCTCCACAGCAATCAG  
CACAGCTCCTTGTCAATGAACTTCATGTCAGTTTCAAATAGGGCAATGAAGGACTAACAAACCCATCAGATGACACAAGTCTACTTT**TGA**

> Langur (Semnopithecus entellus) OWM

**ATG**GTCTCCCTTTCAAACATGCCCCTGCTTCAATTAACCCCTACTGCTTTTTTGACAATTCTAGTACAAGCTCAACACCTGCTTGACACAGTTTTCCGAA  
CACTAFTCTATCTTGACTAATCAGTCTAATTTGCTGGCTATGTGAGCATCTAGATAATGCGAACAACCGAAGTACTGTTTTGTTCTGCGAGTGAAGCAC  
CTGGTGGACCTATTCTGGACAATGGATGTATGAAAGGGTGTGGTATCCACAAGCAGAAGTACAGAATCACTCTACTTCTCCTATGGTAAAGCGACTTGG  
CACTGGGAAGCCGCTATGGAAGCTCAAGGCTATCCCTTCGCTCAAGTAAAGTTATTGGAGGAAATCTTCTCTTTGATAGAAAATAAAAATGGCAGTCTG  
GACCCCTCCAGGTAATATACCTAAACAATACTGTAATCAAACTACTATGGTTTGTATTTACAGATGGCACCTTCATGCCCCTCCTATAGATGTTACAGATGA  
ATCCAGGAATGATTATGATGATACAAAGTGTTCCTTAGGCCTAGGCCTAGACAATGTTCCCTGGTTCGAGGTTGCACAAACCGAGCTCGGAACAGTCTAGCTGTT  
CCCTTGATTGGTCTACCCAATACCCAAGACTACAAATGGGTAGATCGAAATCTGGATTGACCTGGTCAAGTAATGGCACCTGTCTTTATAGCTGCCAAA  
ACCAACCAAAGGCCCTCTGTACCAGCTATTTCGCAACCTATTTCCTTATGGCTGACAGAGGCACATGGGAAATGGAGATGTGAGATGTCACCAT  
AATAATGACAAAGGTCATGATGGACACCAGAACCCACCCCTGGTGGCTCACAGGTTCCAATCTGACCTTGTCTGTGAACAACCTGGCCCTTTTTTTTTTA  
TGCGGCAATGGGGTGTACAAAGGGTTTCCACCTAAATGGCTGGAGCATGTGGACTGGGTATCTGGTACCTTCCCTCACCAGATACCTCACCTAAATG  
CTAGCCAAATTACAAACCTGAGATCCTTCATTCATAAAGTAACACCACATAGATGCACCCAACGAGACACAGACAATCCACCTCTGTATTGCAACCCCAA  
GGCAATTAACAAGTAAAGGCCCTTTTTCCAAAGTTTGGGAACCTATGATTTAGAAAAGGCAATCTAAACATTTCCAAAGCAATGGAACAGGAATTCAGT  
GCCACTAAGCAGACCTTGAAGCACACCAATCAAAGTTAGCAGTTTAGCTGCTGCATCCCAGAAAGGATCATGTCTTGGATATACCAACCCCAACGAC  
AAACGGCTTGTAGAACTGTTGGCAACAGTGTTCCTCTATATAAAATCAATTCGGAAGCAATAATGTCTGATAACAACATCTATATGAAATATCTGAGAA  
CCTGAAGAATGGACCTTTTTTTGATTGGGAAGGCCTATTGCAAAAGTGGGAGACTGGTTCAGATCATGGGGTATGTGCTTTAATTTGTTCTTTTCTGC  
TTATTCATCTTTGTTTAAATCTATGTTTCAGTCTTTTGGCAATCTCCAGATCCCTTAACTCCAACCTCTGAACCCAGCCTTATCTCCACAGCAATCAG  
CACAGCTCCTTGTCAATGAACTTCATGTCAGTTTCAAATAGGGCAATGAAGGACTAACAAACCCATCAGATGACACAAGTCTACTTT**TGA**

> Spider monkey (Black-handed spider monkey)NWM

**ATG**GATTCCCTTTCAAACATGTTCTGCTTCAACTAACGCTTACTGCTTTTTTGACAATTGAGTGCACCTCAACACCTGCTTGACACAGTTTTCCGAA  
CACTGTCTGTCTTGACTAATCAGTCTAATTTGCTGGTATGTGAAACATCTAGATAATGCGAAGAACCAGAACAGTACTTTTTGTTCTGCGAGTGAAGCAC  
CTGGTGGACCCATTCTGGACAATGGATGTATGAAAGGGTATGGCATCCACAAGCAGAAGTGCAGAATCACTCTACTTCTCCTGGGATAAAGTGAAGTCTAG  
CACTGGGAAGCCTTCTATGGAAGCTCAAGGCTATCCCTTTCGCTCAAGTAAAGTTATTGGAGGAAATCTTCTCTTTGATAGAAAATAAAAATGGCAGTCTG  
GACCCCTCCAGGTAACATACCTAAACAATATTGATTTCAAACACTATGGTTTGTATCTACAGATGGCACCTTCACACCCCTCTATAGATGTTACAAAGGA  
ATCCAGGAATGATTATGATGATACAAAGTGTTCCTTAGGCCTAGGCCTAGACAATGTTCCCTGGTTCGAGGTTGCACAAACCGAGCTCGGAACAGTCTAGCTGTT  
TACCAGTGGGTAGATCGAAATCTGGATTGACCTGGTCAAGTAATGACACCTGCCTATATAGCTGCCAAAACCAACCAAGGCCCTTCTGTACCAGCTAT  
TTCACAACATATTTTCTCTTATGGGCTGACAGAGGCTCATGGGAATGGGGATGTGCAGATGCCAACATAAATAATGACAAAGGTCATGATGGACACCA  
GACCCACCTGGTGGCTCACAGGTTGCCAATCTGACCTTGTCTGTGAACAACCTGCTCTCTTTTATGTTGGCAATGGGTTATACAAAGGGTTTCCCA  
CCGAAATGGTCAAGGCGATGTGGACTTTGGGTATCTGGTACTTCCCTCACCAGATACCTTCTTAAATGCTAGCCAAATTAACAACCTGAGATCCTTCA  
TTCATAAAGTAACACTACGTAGACGCACCAACGAGACACAGACAATCCACCTCTGTATTACAAACCCAGGACAATTAACAATAAAGGCCCTTTTTTCC  
AAGTTTGGGAACCTTGATTTAGAAAAGGCAATTTTAAACCTTTCCAAAGGATAGACCCAGGAATTCGGTGCACCTAGCCGACCTTGAAGGACACACCAA  
TCAAAAGTTGGCAGTTTAGCCTCTGATGCCCAACATGATCGTGTCTTGGATATACCCGACCCCAACGGCAACCGGCTTGTGGAACTGTGGCAACAGT  
GTTGCTCTATATAAAATCAATTCGGAAGATATAATGTCTGATATACAGCGCATCAAAGACATATCCGAGAACATGAAGAATATACCGTTATTTGATTGGGG  
AGACTGGTTCATATGAGGGCTATGACTTTTAAATGTTTTTTCTGCTTAAATCATCTTTGTTCTGACCTATGTTCTGCTTTTCCAAATCTCACAGA  
TCCCTTAACTCCAACCTCTGTACCAGTCTTATCTCCACAGCAATCAGCA**TAG**

> Saki monkey (*Pithecia pithecia*)NWM

**ATGGGTTCCCTTTCGAACTATGTTCTGCTTCAACTAACCTTACTGCTCTTTTGACAATTCGAGTGC AACCTCAACACCTGCTAGCACCAGTTTTCCGAA**  
CACTGTCTATCTTGGACTAATCAGTCTAATTGCTGGTTATGTGAACATCTAGATAATGCAGAAGAACCTGAAC TAGTTTTGTTCTGCCAGTGCAAGCAC  
CTGGTGGACCTATTCCTGGTCAATGGATATACCAAAGGGTATGGCATCTACAAGCGGAAGTGCAGAATCACTCTACTTCTCCTATGATAAAGTGA CTAG  
CACTGGGAAGCCTTCATGGAAGCTCAAGGCTATCCTTTGCTCAAGTAAGGTTATTGGAGGGAAATTTTCTCTTTGTGTAGAAAATAAAAAATGGCACTG  
GACCCTTCTTAGGTAACATACCTAAACAATATTTGATTTCAAACATTTATGGTTTGATTCTACAGATGGCACCTTCACACCCCTCFATAGATGTTACAAAGGA  
ATCCAGGAATGATAATGATGATACAAAGTGTTTACCTACACACTAGACAATGTCTTGGTTTTGCAGATTGCACAAACTGGACCTGGAACAGCTCAACGGTT  
CCCTTGATTGGTCTTCTTAGTACCCAAGACTACCAATGGGTAGATCGAAATTTCTGGATTGACCTGGTCAGGTAATGACTTGCCTATATAGCTGCCAAA  
ACCAAACCAAGGCCCTTCTGTACCAGCTATTTTCGCAACATATTTTGCTCTTATGGGCTAACAGAGGCGCATGGGAAATGGAGATGTGCAGATGCCAACAT  
AACTAATGACAAAGATCAAAATGGACACCAGACCCCCACCTGGTGGCTCACAGTTGCCAATCTGACCTGTGCGGTGAACAACCTGGTCTCTTTATTTTA  
TGTGGCAACGGGGTATACAAAGGGTTTCCACCGAAATGGTCAGGGCGATGTGGACTTGGGCGTCTGGTACCTTCCCTCACCAGATACCTCACCTTAAATG  
CTAGCCAAATTACAAACCTGAGATCCTTCATTCATAAAGTAACACCACATAGACGCACCAAACGAGACACAGACAATCCACCTCTGTATTACACCCCAA  
GGACAATTAACAATAAGGGCCCTTTTCCAAGTTTGGGAACCTTCTGATTTAGAAAAGGCAATTTTAAACCTTCCAAAGCAATAGAACAGGAATTCAGT  
GCCACTCAGCCGAACCTGGAAGCACACCAATCAAAAAGTTAGCAGTTTAGCCTCTGCATCCCCAAATGATCGTGTCTTGGATATACCGACCACCCAACGGC  
AAACGGCTTGTGGAACGTGGCAACAGTGTGCCCTATATAAATAATTCGGAAGATATAATGTCTGATATACAGCGTATCAAAGACATATCTGAGAA  
CATGAAGAATGTACCGTTATTTGATTGGGGAGACTGGTTTCAGATCATGGGGCTATGTGTTTTTAATGTTTTTTCTGCTTAATCATCTTTGTCTAATC  
TATGTTCTGTTCTTTCACAAATCTCACAGATCCCTTAACTCCCAACCTCTGTACCCAGTCTTATCTCCACAGCAATCAGC**ATAG**
